# Supplementary material
Source: PubMed Central journal article supplement (PMC4680974)
Supplement: NIHMS742956-supplement-2.pdf [file NIHMS742956-supplement-2.pdf]

## Supplementary Materials for

### Protein phosphatase 2A regulatory subunit B56 $\alpha$ limits phosphatase activity in the heart

Sean C. Little, Jerry Curran, Michael A. Makara, Crystal F. Kline, Hsiang-Ting Ho, Zhaobin Xu, Xiangqiong Wu, Iuliia Polina, Hassan Musa, Allison M. Meadows, Cynthia A. Carnes, Brandon J. Biesiadecki, Jonathan P. Davis, Noah Weisleder, Sandor Györke, Xander H. Wehrens, Thomas J. Hund, Peter J. Mohler\*

\*Corresponding author. E-mail: peter.mohler@osumc.edu

Published 21 July 2015, *Sci. Signal.* **8**, ra72 (2015)

DOI: 10.1126/scisignal.aaa5876

#### The PDF file includes:

- Fig. S1. B56 $\alpha$ <sup>+/-</sup> mice display reduced B56 $\alpha$  abundance without changes in the abundance of PP2A core subunits.
- Fig. S2. Wild-type and B56 $\alpha$ <sup>+/-</sup> mice have similar QT intervals.
- Fig. S3. Wild-type and B56 $\alpha$ <sup>+/-</sup> mice have similar peak heart rates after exercise.
- Fig. S4. B56 $\alpha$ <sup>+/-</sup> mice display an aberrant response to adrenergic stimulation.
- Fig. S5. B56 $\alpha$ <sup>+/-</sup> mice display phenotypes associated with increased parasympathetic activity.
- Fig. S6. B56 $\alpha$ <sup>+/-</sup> mice display exaggerated cholinergic response to carbachol administration.
- Fig. S7. B56 $\alpha$ <sup>+/-</sup> and B56 $\alpha$ <sup>-/-</sup> mice display normal ECG responses after inhibition of muscarinic acetylcholine receptors.
- Fig. S8. B56 $\alpha$ -deficient mice display reduced heart rate after inhibition of sympathetic and parasympathetic signaling.
- Fig. S9. B56 $\alpha$ <sup>-/-</sup> hearts display reduced phosphorylation of RyR<sub>2</sub>.
- Fig. S10. B56 $\alpha$  associates with PP2A/C and RyR<sub>2</sub> but is not required for the interaction between RyR<sub>2</sub> and PP2A/C.
- Fig. S11. B56 $\alpha$ <sup>+/-</sup> and B56 $\alpha$ <sup>-/-</sup> atria display reduced phosphorylation of RyR<sub>2</sub>.
- Fig. S12. Myofilament proteins are phosphorylated to a similar extent in wild-type and B56 $\alpha$ <sup>+/-</sup> mice.
- Fig. S13. The PP2A core enzyme is differentially localized in B56 $\alpha$ <sup>+/-</sup> and B56 $\alpha$ <sup>-/-</sup> myocytes.
- Fig. S14. B56 $\alpha$  abundance is increased in ankyrin-B-deficient hearts.

Figure S1

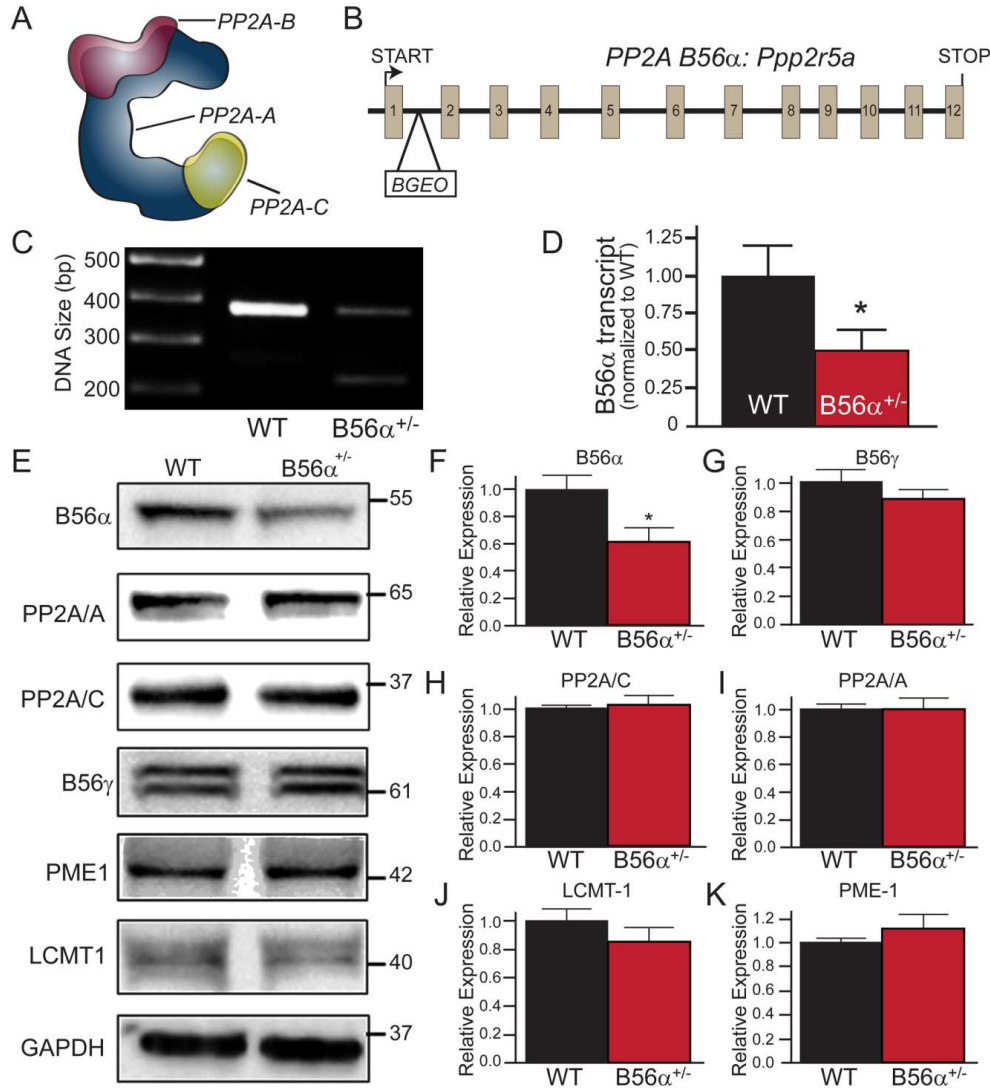

*Fig. S1. B56α<sup>+/-</sup> mice display reduced B56α abundance without changes in the abundance of PP2A core subunits. (A) The PP2A holoenzyme is comprised of structural (PP2A-A), regulatory (PP2A-B), and catalytic (PP2A-C) subunits. (B) Scheme for Ppp2r5a animal model. (C) Representative genotyping of wild-type and B56α<sup>+/-</sup> mice. (D) PCR validation Ppp2r5a abundance in wild-type and B56α<sup>+/-</sup> hearts (n=3 hearts/genotype; \*p<0.05). (E) Representative immunoblots of PP2A-related proteins in wild-type and B56α<sup>+/-</sup> heart lysates. (F-K) Abundance of PP2A subunits and regulatory enzymes in wild-type and B56α<sup>+/-</sup> mouse hearts; \*p<0.05 compared to wild-type; n=6 hearts/genotype.*

Figure S2

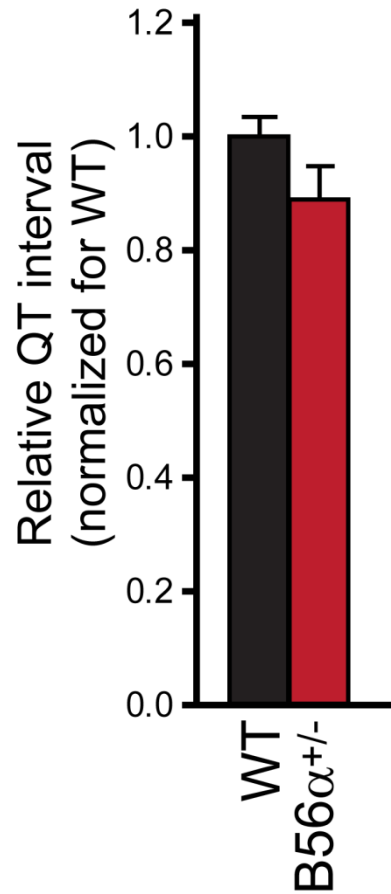

*Fig. S2. Wild-type and B56 $\alpha$ <sup>+/-</sup> mice have similar QT intervals.* Relative QT interval of conscious wild-type and B56 $\alpha$ <sup>+/-</sup> mice averaged over a 24 hour period; n=4 mice/genotype; p=N.S.

Figure S3

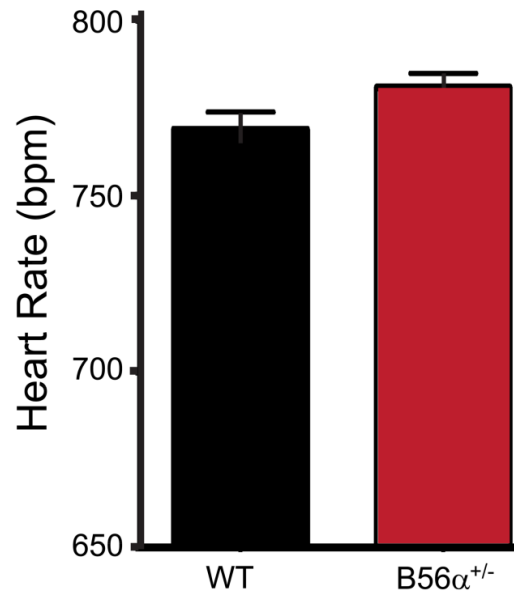

*Fig. S3. Wild-type and B56 $\alpha$ <sup>+/-</sup> mice have similar peak heart rates after exercise. Quantification of heart rate of conscious wild-type and B56 $\alpha$ <sup>+/-</sup> mice following strenuous exercise protocol; n=4 mice/genotype; p=N.S.*

Figure S4

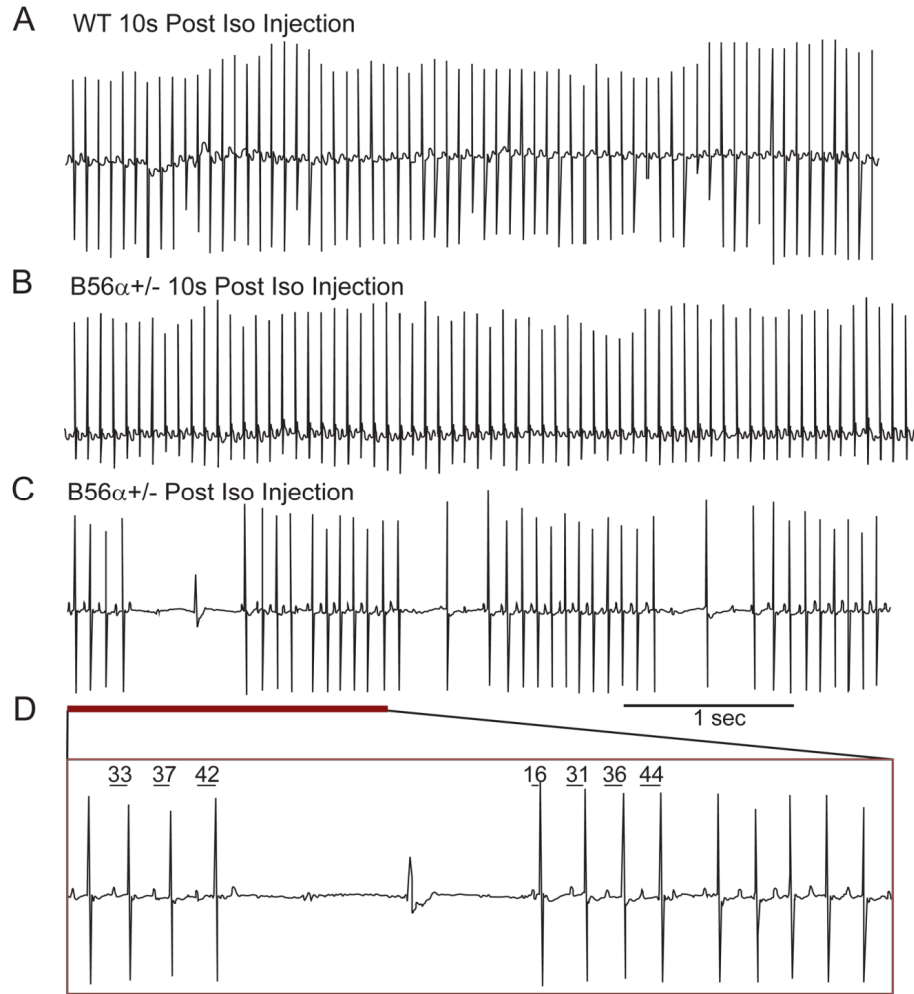

*Fig. S4. B56α<sup>+/-</sup> mice display an aberrant response to adrenergic stimulation. (A-B) Representative wild-type and B56α<sup>+/-</sup> ECG traces 10 s post Iso injection. (C) Reduced heart rate in B56α<sup>+/-</sup> mice post Iso was associated with sinoatrial (SA) and atrio-ventricular (AV) node dysfunction. (D) Iso-dependent arrhythmias in B56α<sup>+/-</sup> mice are characterized by progressive PR interval prolongation (numbers above PR interval indicate msec) followed by a dropped QRS complex in addition to the lack of continuous P-waves. Phenotypes shown in (A-D) were consistently observed in 3 mice/genotype.*

Figure S5

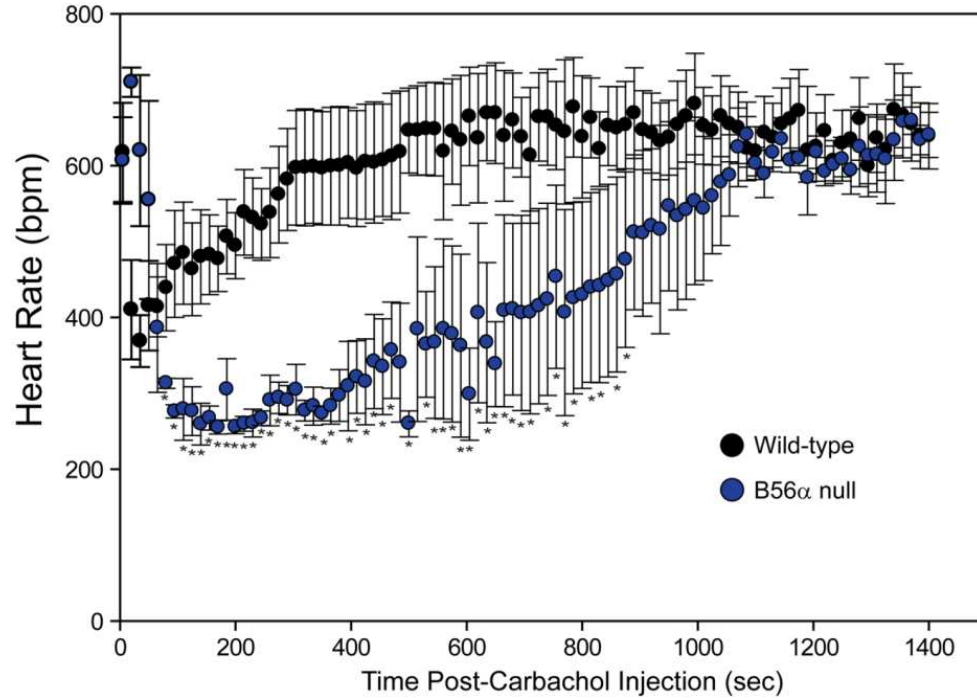

Fig. S5.  $B56\alpha^{-/-}$  mice display phenotypes associated with increased parasympathetic activity. Following acetylcholine receptor activation (CCH; 0.1 mg/kg),  $B56\alpha^{-/-}$  mice displayed a more pronounced reduction in heart rate compared to wild-type mice. Data represents n=3 mice/genotype (\* $p < 0.05$  compared to wild-type).

Figure S6

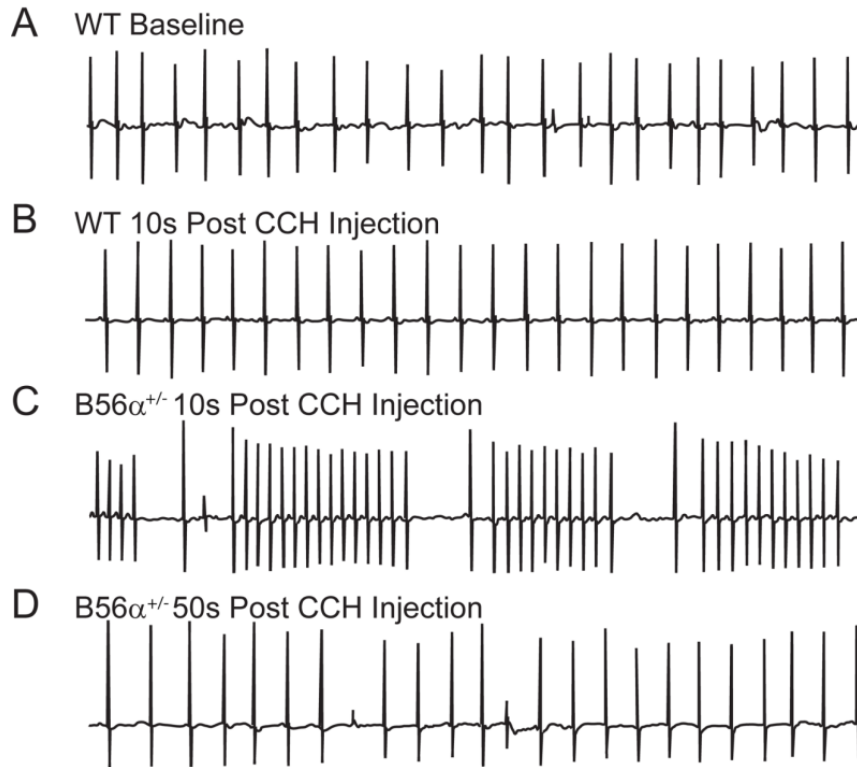

*Fig. S6. B56 $\alpha^{+/-}$  mice display exaggerated cholinergic response to carbachol administration.* Following acetylcholine receptor activation with carbachol (0.1 mg/kg), B56 $\alpha^{+/-}$  mice displayed a more pronounced reduction in heart rate compared to wild-type mice. (A-B) Representative wild-type ECG traces at baseline and post carbachol (CCH) show normal slowing of heart rate with minor RR interval variability. (C-D) B56 $\alpha^{+/-}$  mice post CCH injection initially present with SA and AV node dysfunction that continued >50s following injection. All ECG traces shown are 5s in duration and represent data from n=3 mice/genotype.

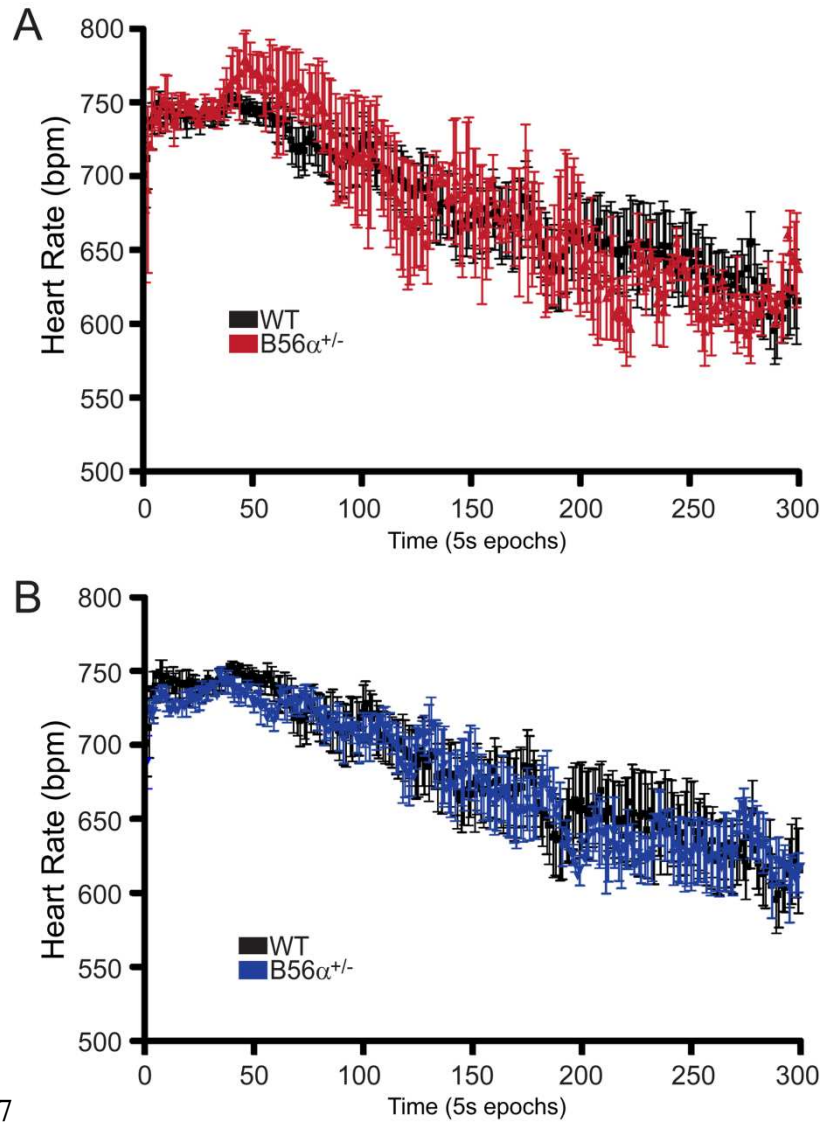

Figure S7

*Fig. S7. B56α<sup>+/-</sup> and B56α<sup>-/-</sup> mice display normal ECG responses after inhibition of muscarinic acetylcholine receptors. (A-C) Wild-type, B56α<sup>+/-</sup> and B56α<sup>-/-</sup> mice displayed similar heart rate response following injection of atropine (1 mg/kg). Wild-type, B56α<sup>+/-</sup>, and B56α<sup>-/-</sup> mice did not present with either atrial or ventricular arrhythmias. Data represents data from n=3 mice/genotype (p=N.S.).*



Figure S8

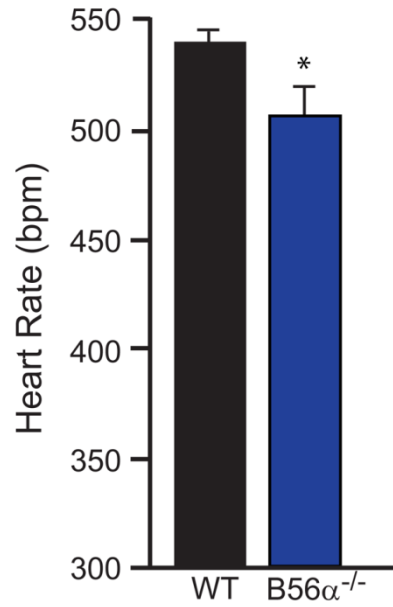

*Fig. S8. B56α-deficient mice display reduced heart rate after inhibition of sympathetic and parasympathetic signaling. B56α deficient mice display reduced heart rate compared with wild-type mice following injection of atropine plus propranolol (n=3 mice/genotype; \*p<0.05 compared with wild-type).*

Figure S9

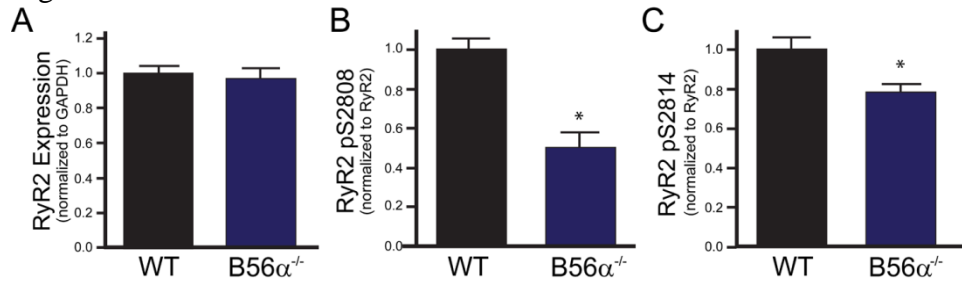

Fig. S9.  $B56\alpha^{-/-}$  hearts display reduced phosphorylation of RyR<sub>2</sub>. (A-C) Quantification of proteins from wild-type and  $B56\alpha^{-/-}$  heart lysates. (A) Although total RyR<sub>2</sub> abundance was unchanged,  $B56\alpha^{-/-}$  mice showed reduced phosphorylation of RyR<sub>2</sub> at (B) Ser<sup>2808</sup> or (C) Ser<sup>2814</sup> (abundance normalized to total RyR<sub>2</sub> abundance). For all experiments, n=4 hearts/genotype; \*p<0.05.

Figure S10

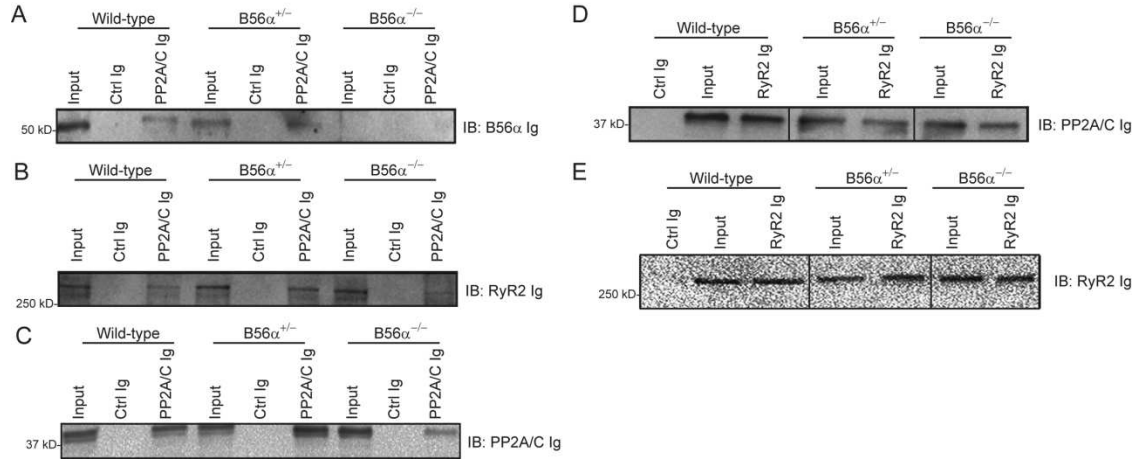

*Fig. S10. B56α associates with PP2A/C and RyR<sub>2</sub> but is not required for the interaction between RyR<sub>2</sub> and PP2A/C. (A) B56α co-immunoprecipitates with PP2A/C from cardiac lysates from wild-type hearts. As expected, B56α did not co-immunoprecipitate with PP2A/C from B56α<sup>-/-</sup> hearts. (B) PP2A/C and RyR<sub>2</sub> co-immunoprecipitate (using PP2A/C Ig) in wild-type, B56α<sup>+/-</sup>, and B56α<sup>-/-</sup> hearts. (C) Control experiments illustrating PP2A/C in co-immunoprecipitations from B. (D) PP2A/C and RyR<sub>2</sub> co-immunoprecipitate (using RyR<sub>2</sub> Ig) in wild-type, B56α<sup>+/-</sup>, and B56α<sup>-/-</sup> hearts. (E) Control experiments illustrating RyR<sub>2</sub> in co-immunoprecipitations from D. Biochemical data was replicated in three independent experiments using three hearts/genotype.*

Figure S11

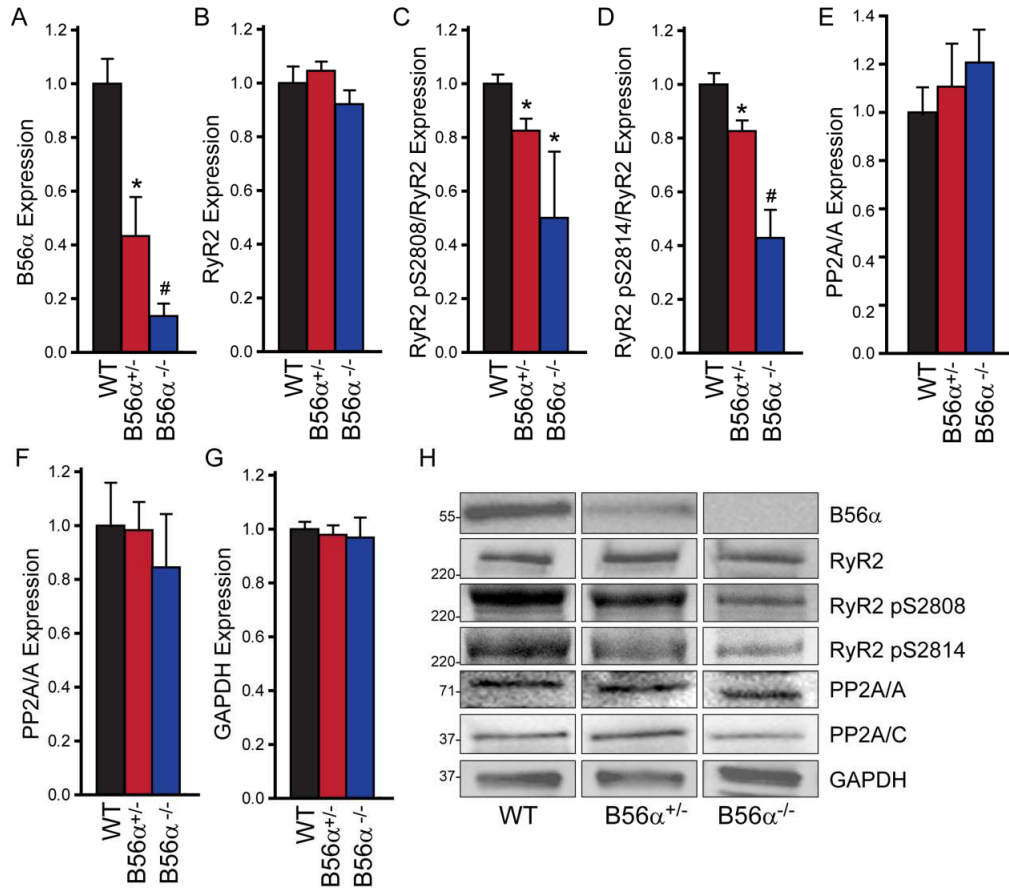

Fig. S11.  $B56\alpha^{+/-}$  and  $B56\alpha^{-/-}$  atria display reduced phosphorylation of RyR<sub>2</sub>. (A-G) Quantification of B56α, RyR<sub>2</sub> and PP2A proteins from wild-type,  $B56\alpha^{+/-}$ , and  $B56\alpha^{-/-}$  atrial lysates (\*p<0.05). (B) Although total RyR<sub>2</sub> abundance was unchanged,  $B56\alpha^{+/-}$  and  $B56\alpha^{-/-}$  atria showed reduced phosphorylation of (C-D) RyR<sub>2</sub> phosphorylated at Ser<sup>2808</sup> or Ser<sup>2814</sup> (phosphorylation was normalized to total RyR<sub>2</sub> abundance; \*p<0.05). We observed no significant difference in the abundance of PP2A/A, PP2A/C, or GAPDH between wild-type,  $B56\alpha^{+/-}$ , and  $B56\alpha^{-/-}$  atrial lysates (p=N.S.). (H) Representative immunoblots for experiments in A-G. For all experiments, n=3 atria/genotype.

Figure S12

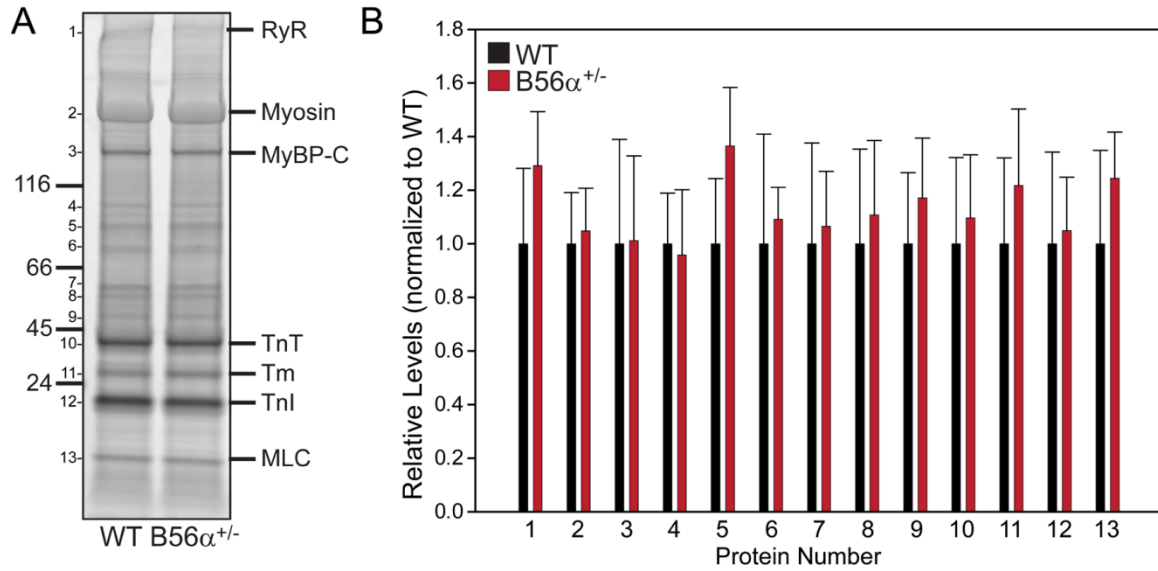

Figure S12. Myofilament proteins are phosphorylated to a similar extent in wild-type and  $B56\alpha^{+/-}$  mice. (A) Representative ProQ stain (representative of n=3 mice/genotype) for total protein phosphorylation levels of myofilament proteins compared between wild-type and  $B56\alpha^{+/-}$  whole tissue lysates. (B) Relative levels of phosphorylation in cardiac proteins from wild-type (n=3) and  $B56\alpha^{+/-}$  heart lysates (n=3 hearts/genotype; p= N.S. for all thirteen proteins analyzed). Protein numbers in B (1-13) represent bands on blot in panel A.

Figure S13

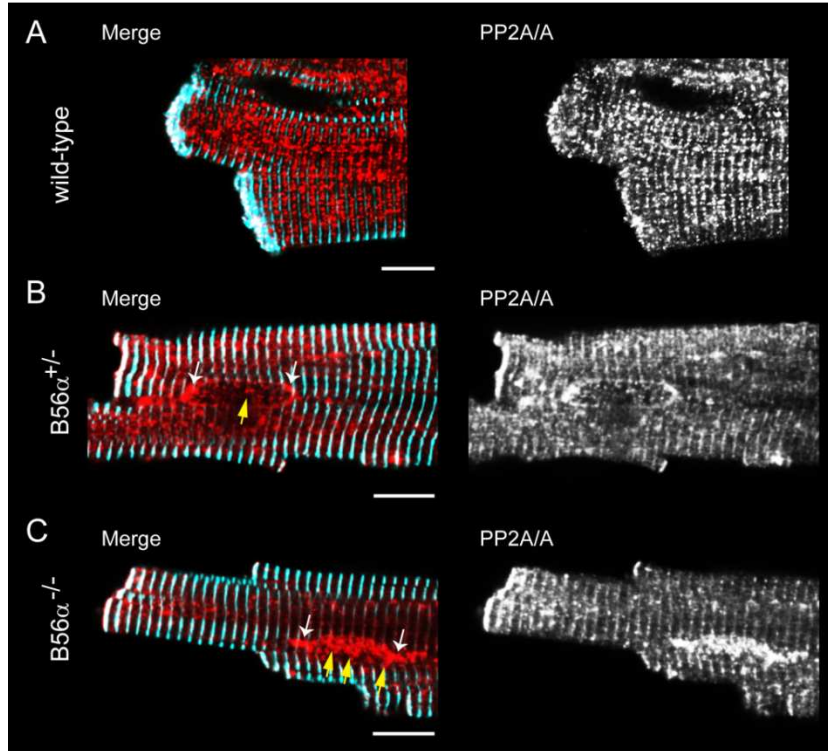

*Fig. S13. The PP2A core enzyme is differentially localized in  $B56\alpha^{+/-}$  and  $B56\alpha^{-/-}$  myocytes. In wild-type myocytes, PP2A/A (red left, white right) is distributed across myocyte membranes and cytosol. In contrast, both  $B56\alpha^{+/-}$  and  $B56\alpha^{-/-}$  myocytes display increased perinuclear (white arrows) and nuclear (yellow arrows) distribution of PP2A/A. However, PP2A is still found in cytosol and on membranes of  $B56\alpha^{+/-}$  and  $B56\alpha^{-/-}$  myocytes. Scale bar equals ten microns, blue represents alpha-actinin labeling. Images are representative of >10 myocytes analyzed per mouse from three mice per genotype.*

Figure S14

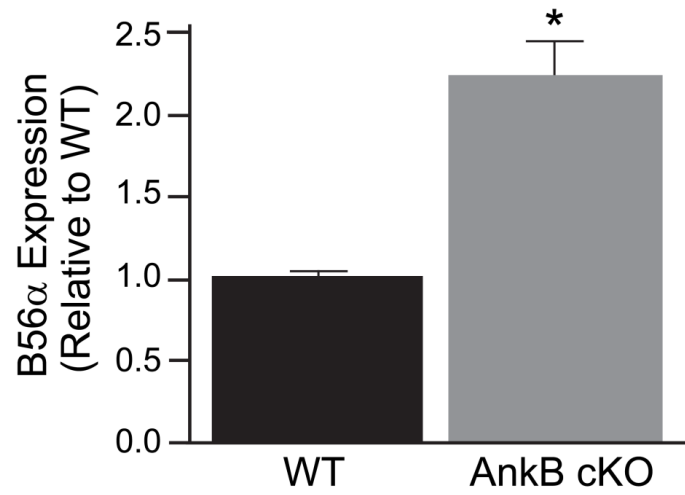

*Fig. S14. B56α abundance is increased in ankyrin-B-deficient hearts.  $\alpha$ MHC-Cre; Ank2<sup>ff</sup> mouse (AnkB cKO) cardiac lysates display increased abundance of B56α compared with wild-type heart lysates (n=3 cardiac lysate preparations/genotype, \*p<0.05).*
